# Supplementary material for: Constructing green mercury-free catalysts with single pyridinic N species for acetylene hydrochlorination and mechanism investigation
Source: Royal Society of Chemistry journal article supplement (doi:10.1039/d0cy01950j), 2021-01-01
Supplement: d0cy01950j1.pdf [file d0cy01950j1.pdf]

## Supporting Information

Constructing green mercury-free catalysts with single pyridinic N species for acetylene hydrochlorination and mechanism investigation

Xianliang Qiao, Xinyu Liu, Zhiqiang Zhou, Qingxin Guan,\* and Wei Li\*

College of Chemistry, State Key Laboratory of Elemento-Organic Chemistry, Key Laboratory of Advanced Energy Materials Chemistry (Ministry of Education), Nankai University, Tianjin 300071, P. R. China

\*Corresponding Authors: Tel: +86-22-23508662, Fax: +86-22-23508662,

E-mail: qingxinguan@nankai.edu.cn. (Q. Guan); weili@nankai.edu.cn. (W. Li)

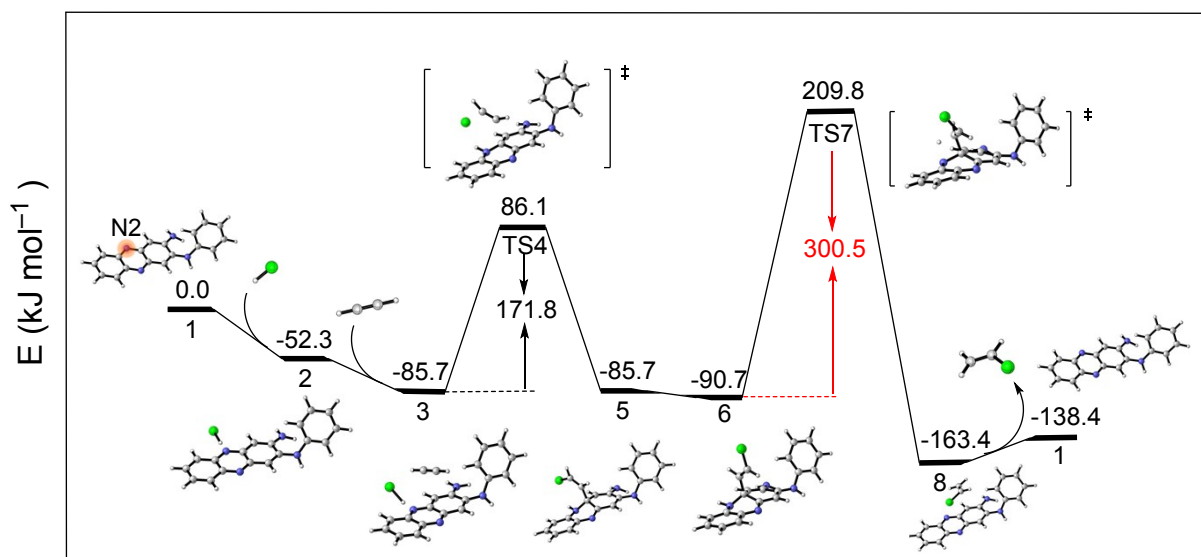

**Fig. S1** Reaction energy diagram of the substances involved in the reaction path 2.

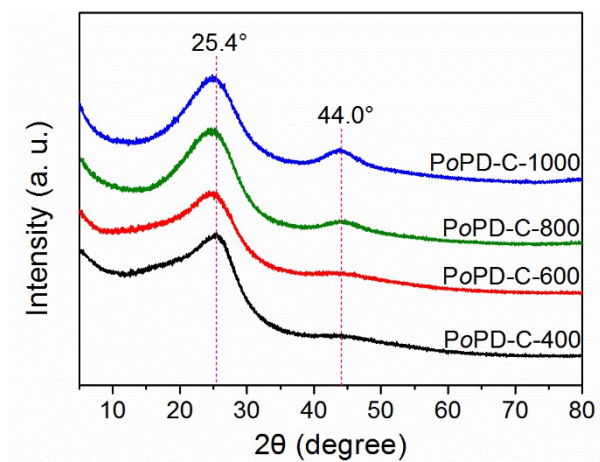

**Fig. S2** XRD patterns of PoPD and PoPD-derived carbon materials.

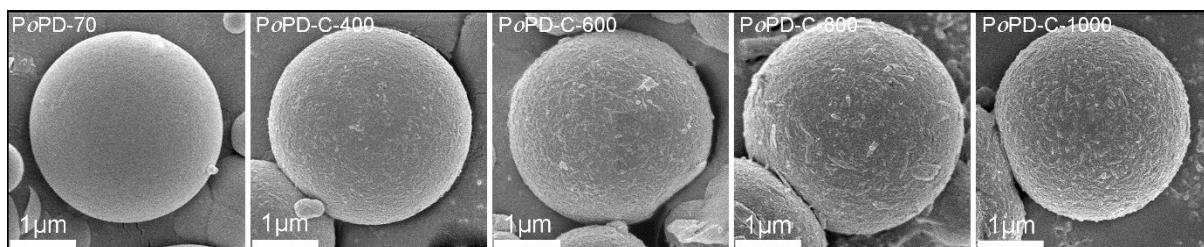

**Fig. S3** SEM images of PoPD-derived carbon materials.

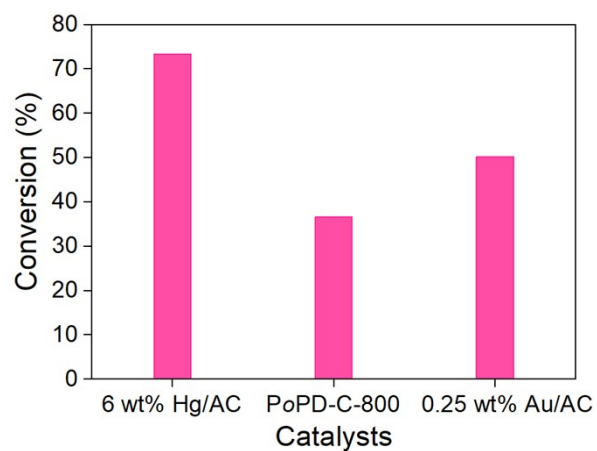

**Fig. S4** Conversion of acetylene over 6 wt% Hg/C, PoPD-C-800, and 0.25 wt% Au/AC catalysts under 200 h<sup>-1</sup> and 150 °C.

**Table S1** Compositions of C, N, and O (wt %) in samples determined by XPS<sup>a</sup> and EA<sup>b</sup> methods.

| Sample      | C (wt %) <sup>a</sup> | N (wt %) <sup>a</sup> | O (wt %) <sup>a</sup> | S (wt %) <sup>a</sup> | C (wt %) <sup>b</sup> | N (wt %) <sup>b</sup> | H (wt %) <sup>b</sup> |
|-------------|-----------------------|-----------------------|-----------------------|-----------------------|-----------------------|-----------------------|-----------------------|
| PoPD-30     | 72.53                 | 18.68                 | 8.27                  | 0.52                  | 69.17                 | 18.78                 | 3.88                  |
| PoPD-50     | 73.03                 | 19.06                 | 7.61                  | 0.30                  | 72.46                 | 19.66                 | 3.53                  |
| PoPD-70     | 73.11                 | 19.57                 | 7.00                  | 0.32                  | 72.98                 | 20.34                 | 3.15                  |
| PoPD-70-300 | 74.10                 | 19.32                 | 6.33                  | 0.25                  | 73.43                 | 19.45                 | 3.07                  |

**Table S2** Textural properties of PoPD-derived carbon materials.

| Sample      | $S_{\text{BET}}$ ( $\text{m}^2 \text{g}^{-1}$ ) | $V_{\text{tot}}$ ( $\text{cm}^3 \text{g}^{-1}$ ) | D (nm) |
|-------------|-------------------------------------------------|--------------------------------------------------|--------|
| PoPD-C-400  | 12                                              | 0.026                                            | 9.5    |
| PoPD-C-600  | 17                                              | 0.032                                            | 7.8    |
| PoPD-C-800  | 93                                              | 0.083                                            | 3.6    |
| PoPD-C-1000 | 240                                             | 0.147                                            | 2.5    |

$S_{\text{BET}}$ : Specific surface area;  $V_{\text{tot}}$ : Total pore volume; D: Average pore diameter.

**Table S3** The comparisons of catalytic performance between PoPD-derived materials and other reported metal-free catalysts.

| Catalyst                          | Temperature (°C) | GHSV (h <sup>-1</sup> ) | Conversion (%) | Reference |
|-----------------------------------|------------------|-------------------------|----------------|-----------|
| SiC@NC                            | 200              | 30                      | 80             | S1        |
| PDA/SiC-600                       | 200              | 30                      | 77             | S2        |
| ZIF-8/SAC                         | 180              | 30                      | 73             | S3        |
| Z <sub>4</sub> M <sub>1</sub>     | 180              | 50                      | 60             | S4        |
| N,S-C-2.5                         | 180              | 50                      | 82             | S5        |
| N-CNTs                            | 180              | 180                     | 3.8            | S6        |
| N-MC-G                            | 220              | 30                      | 85.5           | S7        |
| PSAC-N0.8                         | 250              | 120                     | 68             | S8        |
| C <sub>3</sub> N <sub>4</sub> /AC | 180              | 50                      | 77             | S9        |
| N,P-C600                          | 210              | 50                      | 98.7           | S10       |
| N,S-C-NH <sub>3</sub>             | 220              | 35                      | 80             | S11       |
| C-NH <sub>3</sub> (ZIF-8)         | 220              | 30                      | 92             | S12       |
| AC-n-U500                         | 240              | 30                      | 92             | S13       |
| B,N-graphene                      | 150              | 36                      | 95             | S14       |
| NC1-1073                          | 300              | 320                     | 81             | S15       |
| 3NR/4CAC                          | 220              | 30                      | 97.9           | S16       |
| PANI-AC                           | 180              | 36                      | 76             | S17       |
| N-OMC-O2.0                        | 180              | 50                      | 35             | S18       |
| N-MWCNTs                          | 200              | 116                     | 16.5           | S19       |
| ND@G                              | 220              | 300                     | 50             | S20       |
| C-1000                            | 220              | 36                      | 95             | S21       |
| D-AC-M                            | 220              | 30                      | 63             | S22       |
| MF-700                            | 220              | 30                      | 97             | S23       |
| p-BN                              | 280              | 40                      | 90             | S24       |
| PoPD-70-300                       | 280              | 120                     | 70             | This work |
| PoPD-C-800                        | 220              | 50                      | 98.5           | This work |
| PoPD-C-800                        | 220              | 200                     | 90.1           | This work |

**Table S4** Compositions of C, N, and O (wt %) in PoPD-derived carbon materials determined by XPS.

| Sample      | C (wt %) | N (wt %) | O (wt %) |
|-------------|----------|----------|----------|
| PoPD-C-400  | 72.06    | 13.18    | 14.76    |
| PoPD-C-600  | 77.16    | 10.32    | 12.52    |
| PoPD-C-800  | 79.11    | 8.53     | 12.36    |
| PoPD-C-1000 | 81.93    | 5.91     | 12.16    |

**Table S5** N species contents with binding energies in PoPD-derived carbon materials determined by XPS analysis.

| Sample      | N species contents with binding energies (at.%) |                   |                   |                   |
|-------------|-------------------------------------------------|-------------------|-------------------|-------------------|
|             | Pyridinic N                                     | Pyrrolic N        | Graphitic N       | Pyridinic N-oxide |
| PoPD-C-400  | 45.56 (398.35 eV)                               | 33.49 (399.68 eV) | 18.69 (400.82 eV) | 2.26 (402.64 eV)  |
| PoPD-C-600  | 40.15 (398.37 eV)                               | 22.80 (399.70 eV) | 32.07 (400.70 eV) | 4.98 (402.68 eV)  |
| PoPD-C-800  | 38.27 (398.37 eV)                               | 8.99(399.73 eV)   | 45.33 (400.93 eV) | 7.41 (402.69 eV)  |
| PoPD-C-1000 | 23.51 (398.32 eV)                               | 6.55 (399.74 eV)  | 60.52 (400.98 eV) | 9.42 (402.72 eV)  |

## References

- S1 X. Li, X. Pan, L. Yu, P. Ren, X. Wu, L. Sun, F. Jiao, X. Bao, Silicon carbide-derived carbon nanocomposite as a substitute for mercury in the catalytic hydrochlorination of acetylene, *Nat Commun.*, 2014, 5, 3688.
- S2 X. Li, P. Li, X. Pan, H. Ma, X. Bao, Deactivation mechanism and regeneration of carbon nanocomposite catalyst for acetylene hydrochlorination, *Appl. Catal. B: Environ.*, 2017, 210, 116–120.
- S3 X. Li, J. Zhang, Y. Han, M. Zhu, S. Shang, W. Li, MOF-derived various morphologies of N-doped carbon composites for acetylene hydrochlorination, *J. Mater. Sci.*, 2018, 53, 4913–4926.
- S4 X. Li, J. Zhang, W. Li, MOF-derived nitrogen-doped porous carbon as metal-free catalysts for acetylene hydrochlorination, *J. Ind. Eng. Chem.*, 2016, 44, 146–154.
- S5 J. Wang, F. Zhao, C. Zhang, L. Kang, M. Zhu, A novel S, N dual doped carbon catalyst for acetylene hydrochlorination, *Appl. Catal. A-Gen.*, 2018, 549, 68–75.
- S6 K. Zhou, B. Li, Q. Zhang, J.-Q. Huang, G.-L. Tian, J.-C. Jia, M.-Q. Zhao, G.-H. Luo, D. S. Su, F. Wei, The catalytic pathways of hydrohalogenation over metal-free nitrogen-doped carbon nanotubes, *ChemSusChem*, 2014, 7, 723–728.
- S7 G. Lan, Y. Wang, Y. Qiu, X. Wang, J. Liang, W. Han, H. Tang, H. Liu, J. Liu, Y. Li, Wheat flour-derived N-doped mesoporous carbon extrudate as superior metal-free catalysts for acetylene hydrochlorination, *Chem. Commun.*, 2018, 54, 623–626.
- S8 X. Wang, B. Dai, Y. Wang, F. Yu, Nitrogen - doped pitch - based spherical active carbon as a nonmetal catalyst for acetylene hydrochlorination, *ChemCatChem*, 2014, 6, 2339–2344.
- S9 X. Li, Y. Wang, L. Kang, M. Zhu, B. Dai, A novel, non-metallic graphitic carbon nitride

- catalyst for acetylene hydrochlorination, *J. Catal.*, 2014, 311, 288–294.
- S10 J. Zhao, B. Wang, Y. Yue, G. Sheng, H. Lai, S. Wang, L. Yu, Q. Zhang, F. Feng, Z.-T. Hu, X. Li, Nitrogen- and phosphorus-codoped carbon-based catalyst for acetylene hydrochlorination, *J. Catal.*, 2019, 373, 240–249.
- S11 X. Dong, S. Chao, F. Wan, Q. Guan, G. Wang, W. Li, Sulfur and nitrogen co-doped mesoporous carbon with enhanced performance for acetylene hydrochlorination, *J. Catal.*, 2018, 359, 161–170.
- S12 S. Chao, F. Zou, F. Wan, X. Dong, Y. Wang, Y. Wang, Q. Guan, G. Wang, W. Li, Nitrogen-doped carbon derived from ZIF-8 as a high-performance metal-free catalyst for acetylene hydrochlorination, *Sci. Rep.*, 2017, 7, 39789.
- S13 T. Zhang, J. Zhao, J. Xu, J. Xu, X. Di, X. Li, Oxygen and nitrogen-doped metal-free carbon catalysts for hydrochlorination of acetylene, *Chin. J. Chem. Eng.*, 2016, 24, 484–490.
- S14 B. Dai, K. Chen, Y. Wang, L. Kang, M. Zhu, Boron and nitrogen doping in graphene for the catalysis of acetylene hydrochlorination, *ACS Catal.*, 2015, 5, 2541–2547.
- S15 R. Lin, S. K. Kaiser, R. Hauert, J. Pérez-Ramírez, Descriptors for high-performance nitrogen-doped carbon catalysts in acetylene hydrochlorination, *ACS Catal.*, 2018, 8, 1114–1121.
- S16 S. Mei, J. Gu, T. Ma, X. Li, Y. Hu, W. Li, J. Zhang, Y. Han, N-doped activated carbon from used dyeing wastewater adsorbent as a metal-free catalyst for acetylene hydrochlorination, *Chem. Eng. J.*, 2019, 371, 118–129.
- S17 C. Zhang, Li. Kang, M. Zhu, B. Dai, Nitrogen-doped active carbon as a metal-free catalyst for acetylene hydrochlorination, *RSC Adv.*, 2015, 5, 7461–7468.



- S18 Y. Yang, G. Lan, X. Wang, Y. Li, Direct synthesis of nitrogen-doped mesoporous carbons for acetylene hydrochlorination, *Chinese J. Catal.*, 2016, 37, 1242–1248.
- S19 X. Li, X. Pan, X. Bao, Nitrogen doped carbon catalyzing acetylene conversion to vinyl chloride, *J. Energy Chem.*, 2014, 23, 131–135.
- S20 G. Lan, Y. Qiu, J. Fan, X. Wang, H. Tang, W. Han, H. Liu, H. Liu, S. Song, Y. Li, Defective graphene@diamond hybrid nanocarbon material as an effective and stable metal-free catalyst for acetylene hydrochlorination, *Chem. Commun.*, 2019, 55, 1430–1433.
- S21 J. Wang, W. Gong, M. Zhu, B. Dai, Effect of carbon defects on the nitrogen-doped carbon catalytic performance for acetylene hydrochlorination, *Appl. Catal. A-Gen.*, 2018, 564, 72–78.
- S22 Y. Qiu, S. Ali, G. Lan, H. Tong, J. Fan, H. Liu, B. Li, W. Han, H. Tang, H. Liu, Y. Li, Defect-rich activated carbons as active and stable metal-free catalyst for acetylene hydrochlorination, *Carbon*, 2019, 146, 406–412.
- S23 X. Qiao, Z. Zhou, X. Liu, C. Zhao, Q. Guan, W. Li, Constructing a fragmentary g-C<sub>3</sub>N<sub>4</sub> framework with rich nitrogen defects as a highly efficient metal-free catalyst for acetylene hydrochlorination, *Catal. Sci. Technol.*, 2019, 9, 3753–3762.
- S24 P. Li, H. Li, X. Pan, K. Tie, T. Cui, M. Ding, X. Bao, Catalytically active boron nitride in acetylene hydrochlorination, *ACS Catal.*, 2017, 7, 8572–8577.
